# Supplementary material for: The Effects of Tocotrienol-Rich Vitamin E (Tocovid) on Diabetic Neuropathy: A Phase II Randomized Controlled Trial
Source: MDPI journal article supplement (doi:10.3390/nu12051522), 2020-05-23
Supplement: s1 [file s1=3fversion=3d1590232739]

List of Participating Investigators

- Ng Yeek Tat1,2
- Sonia Phang Chew Wen1
- Gerald Tan Chen Jie1,2
- Ng En Yng1,2
- Nevein Philip Botross Henien2
- Uma Devi M Palanisamy1
- Badariah Ahmad1
- Khalid Abdul Kadir1,2,3

*Recruitment and Research Centers*

1Monash University Clinical Research Center Bandar Sunway

2Monash University Clinical Research Center Johor Bahru

3Thomson Hospital Kota Damansara
